# Supplementary material for: Terahertz photodetector arrays based on a large scale MoSe2 monolayer
Source: Royal Society of Chemistry journal article supplement (doi:10.1039/c6tc02748b), 2016-01-01
Supplement: c6tc02748b1.pdf [file c6tc02748b1.pdf]

Supporting Information for

**Terahertz photodetectors arrays based on large scale MoSe<sub>2</sub> monolayer**

*Huiqiang Liu,<sup>†a</sup> Zuxin Chen,<sup>†a</sup> Xuechen Chen,<sup>a</sup> Sheng Chu,<sup>\*a</sup>  
Jingwen Huang,<sup>b</sup> and Rufang Peng<sup>b</sup>*

<sup>a</sup>State Key Laboratory of Optoelectronic Materials and Technologies, School of Material Science and Engineering, Sun Yat-Sen University, Guangzhou 510275, China

<sup>b</sup>School of Material Science and Engineering, Southwest University of Science and Technology, Mianyang 610083, China

<sup>†</sup>These authors contributed equally to this work.

<sup>\*</sup>To whom correspondence should be addressed. E-mail: Sheng Chu, [chusheng@mail.sysu.edu.cn](mailto:chusheng@mail.sysu.edu.cn)

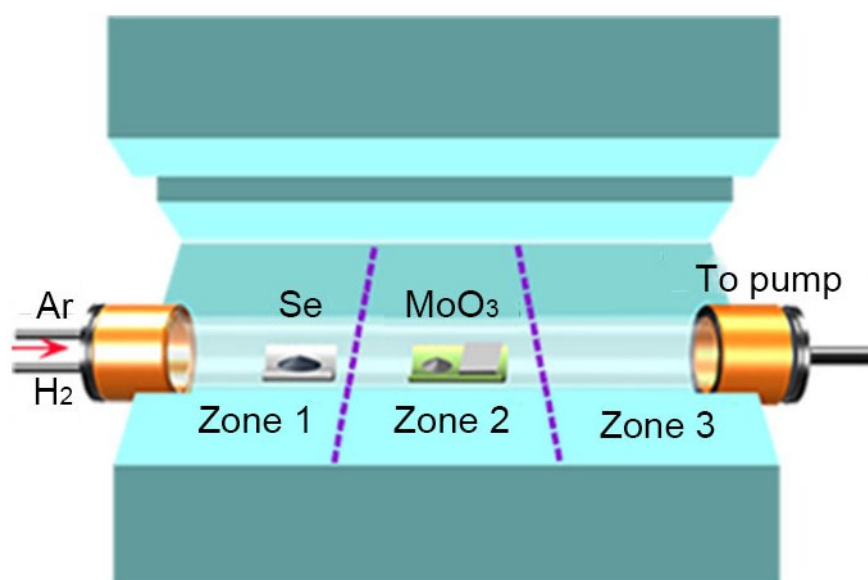

**Supplementary Figure 1.** A schematic illustration of the MoSe<sub>2</sub> CVD system. It should be noted that the SiO<sub>2</sub>/Si substrate with the polished side faced downward.

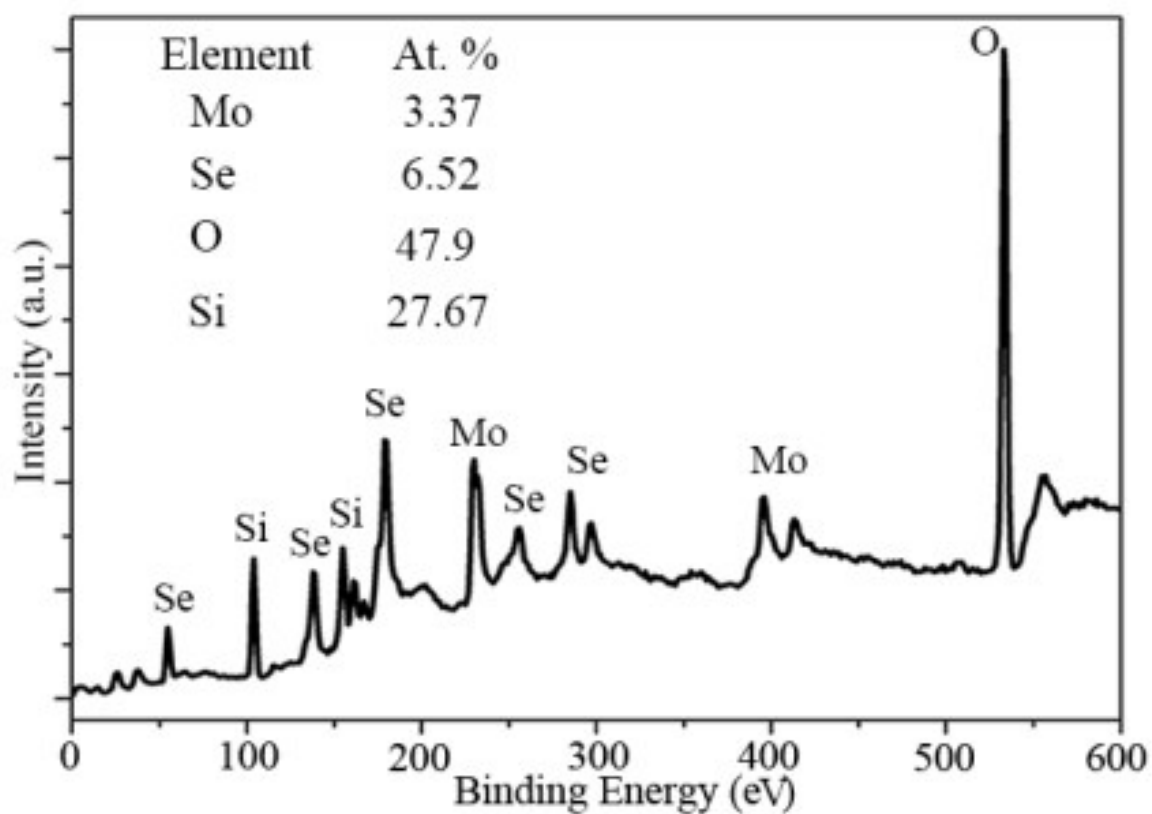

**Supplementary Figure 2.** XPS spectrum of the sample. Four elements are present: Mo and Se (from the sample), Si and O (from the substrate).
